# Supplementary material for: Poly (N-vinylpyrrolidone) Modification Mitigates Plasma Protein Corona Formation on Phosphomolybdate-based Nanoparticles
Source: Research Square preprint supplement (doi:10.21203/rs.3.rs-864653/v1), 2021-09-07
Supplement: Supplementary file 1 [file eb68e1728db1b1abdf818632.docx]

**
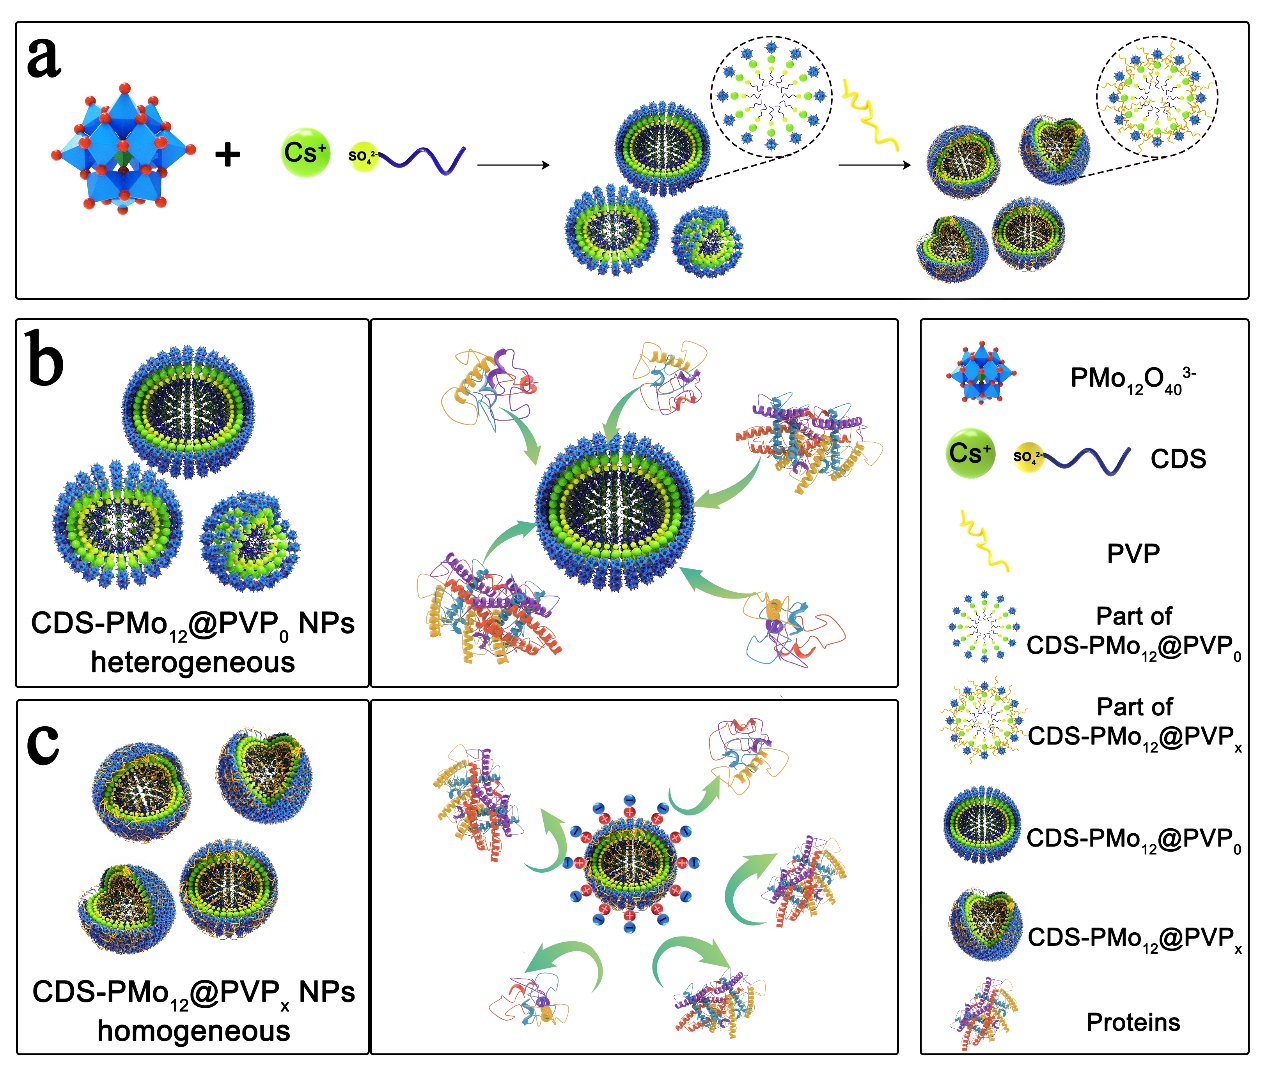
**

The introduction of PVP to the CDS-PMo12O403- reaction system further synthesizes homogenous CDS-PMo12@PVPx(x=0.05~1) NPs, Heterogeneous CDS-PMo12@PVP0 NPs without PVP coating protection could largely adsorb proteins. In contrast, PVP modified homogeneous CDS-PMo12@PVPx(x=0.05~1) NPs could protect the NPs from protein adsorption.
